# Supplementary material for: Telehealth service use and quality of care among US adults with diabetes: A cross-sectional study of the 2022 health information national trends survey
Source: HighWire-hosted journal article supplement (doi:10.1136/bmjopen-2024-086418), 2024-10-01
Supplement: bmjopen-2024-086418supp001_data_supplement.pdf [file bmjopen-2024-086418supp001_data_supplement.pdf]

**Supplemental Figure 1.** Telehealth Modality Type among US Adults with Diabetes between Metro and Non-Metro Areas

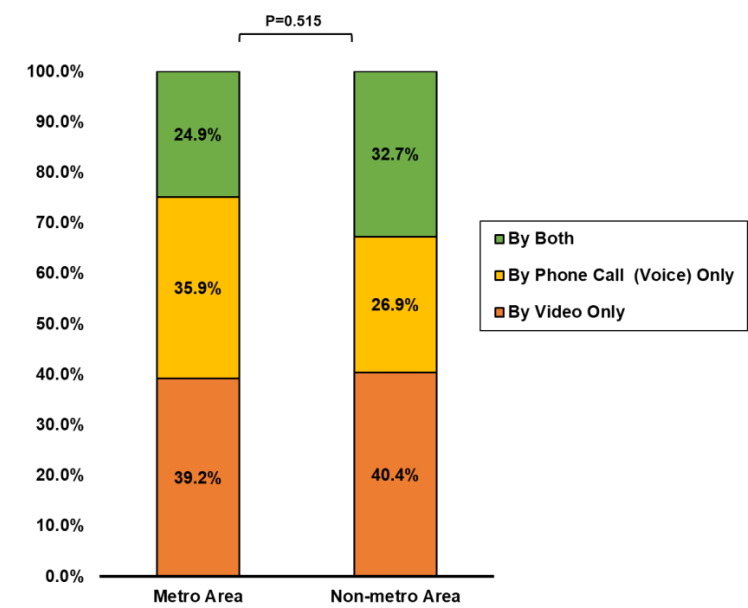

**Supplemental Figure 2.** Reasons for Using or Not Using Telehealth Services among US Adults with Diabetes between Metro and Non-Metro Areas

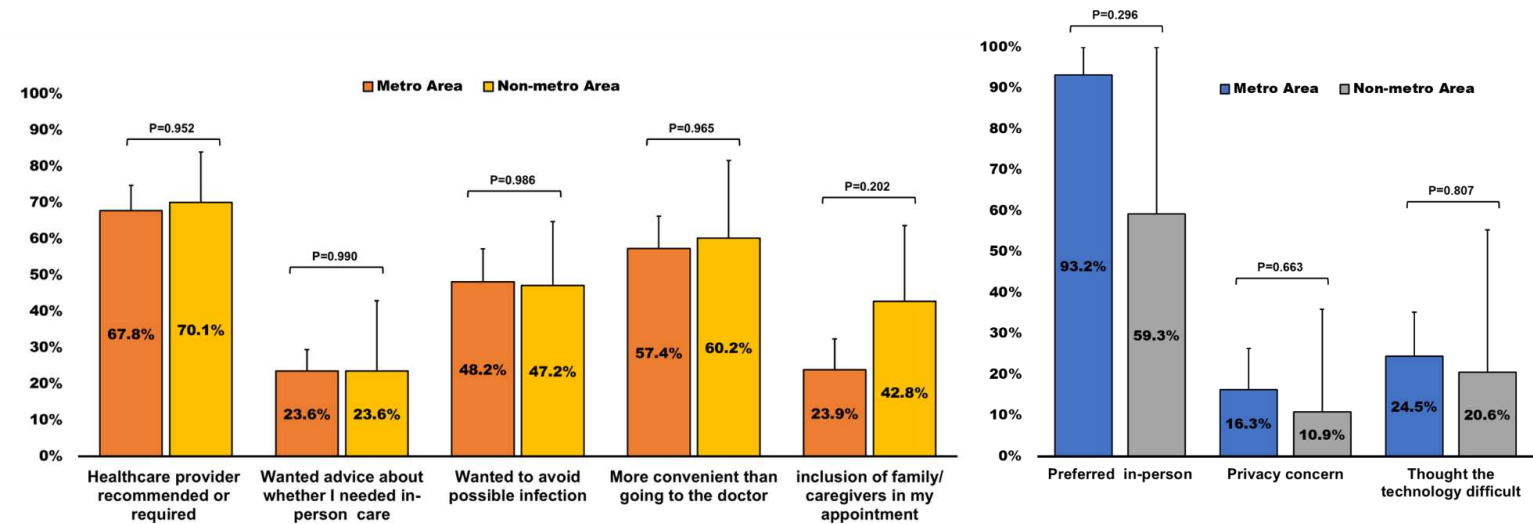

**Supplemental Figure 3.** Patient-Reported Quality of Care Outcomes by Telehealth Use among US Adults with Diabetes between Metro and Non-Metro Areas

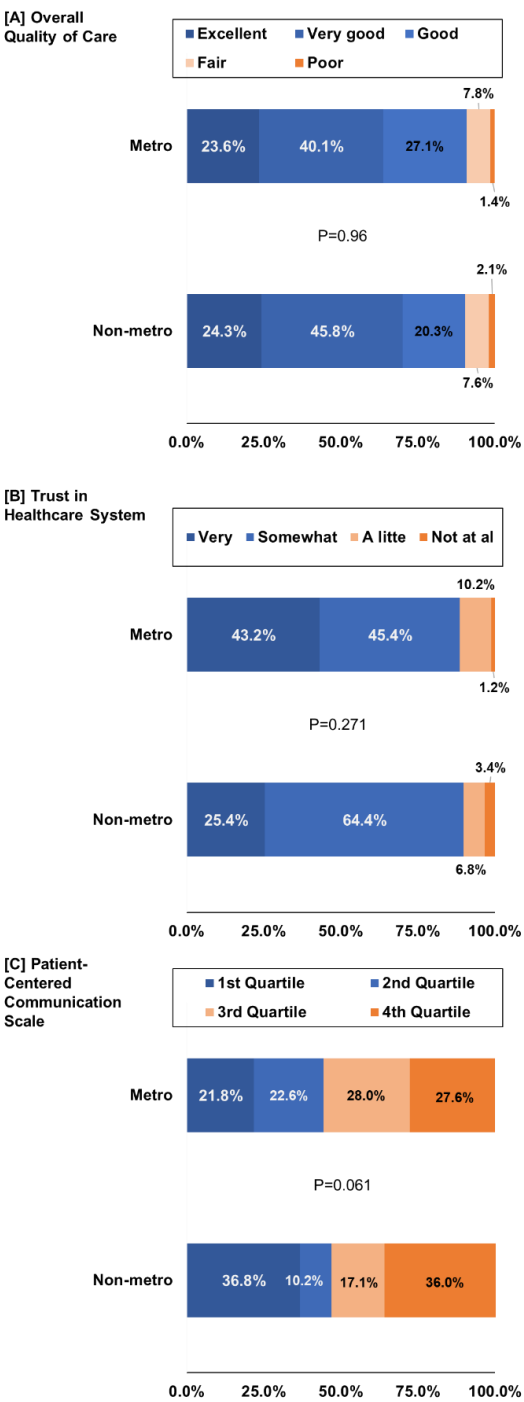

**Supplemental Table 1.** Patient-Reported Quality of Care Outcomes by Telehealth Modality

|                                      | By Video Only | By Phone Call Only | By Both |         |
|--------------------------------------|---------------|--------------------|---------|---------|
| Outcome                              | N=202         | N=225              | N=116   | P-value |
| Overall Quality of Care              |               |                    |         | 0.765   |
| Excellent                            | 21.9%         | 24.7%              | 25.0%   |         |
| Very good                            | 38.7%         | 46.9%              | 35.6%   |         |
| Good                                 | 29.9%         | 16.9%              | 33.7%   |         |
| Fair                                 | 7.8%          | 9.7%               | 5.1%    |         |
| Poor                                 | 1.7%          | 1.7%               | 0.7%    |         |
| Trust in Health System               |               |                    |         | 0.477   |
| Very                                 | 39.7%         | 35.6%              | 51.4%   |         |
| Somewhat                             | 45.3%         | 54.1%              | 41.7%   |         |
| A little/ not at all                 | 15.0%         | 10.3%              | 6.9%    |         |
| Patient-Centered Communication Scale |               |                    |         | 0.144   |
| 1st Quartile (Poor)                  | 23.1%         | 25.7%              | 20.7%   |         |
| 2nd Quartile                         | 27.8%         | 23.5%              | 8.4%    |         |
| 3rd Quartile                         | 20.2%         | 23.2%              | 41.7%   |         |
| 4th Quartile (Best)                  | 28.9%         | 27.5%              | 29.1%   |         |
